# Supplementary material for: Adaptive Quantum-Inspired Framework with Meta-Learning for Enhanced ALS Biomarker Discovery and Brain-Computer Interface Applications
Source: Research Square preprint supplement (doi:10.21203/rs.3.rs-7513254/v1), 2025-10-23
Supplement: Supplementary file 1 [file cdd99ea8cdf43a8eae591ced.xlsx]

## Sheet: Beta_Power_Topography
Electrode	ALS_Mean	ALS_SEM	Control_Mean	Control_SEM	p_value	Cohen_d	Percent_Change
Fp1	1.49456	0.13469	2.46068	0.164451	0.428097	0.439656	-39.2623
Fp2	1.87113	0.0983346	1.82973	0.119332	0.207699	0.232218	2.26234
F7	1.32692	0.14572	2.17849	0.1351	0.237452	0.163859	-39.0899
F3	1.9791	0.112305	2.57888	0.145836	0.122862	0.107252	-23.2574
Fz	1.39765	0.141423	2.082	0.157364	0.376309	0.497982	-32.8698
F4	1.98952	0.111673	2.18506	0.146737	0.0479852	0.160149	-8.94908
F8	1.59963	0.1435	2.4221	0.161684	0.110096	0.317835	-33.9567
T3	2.11943	0.140232	2.3781	0.158181	0.199844	0.131585	-10.8773
C3	1.04763	0.104066	2.46541	0.114275	1.48187e-05	1.2	-57.5068
Cz	0.530854	0.0861182	1.79187	0.125953	0.000344761	1.2	-70.3743
C4	0.928722	0.0844167	2.09514	0.102041	0.00044737	1.2	-55.6727
T4	1.49791	0.112708	2.19577	0.120118	0.347915	0.491786	-31.7818
T5	1.9891	0.0828514	1.96332	0.101052	0.212604	0.308256	1.31322
P3	0.971802	0.123532	1.70315	0.148077	0.369093	0.26693	-42.9409
Pz	1.22885	0.136569	1.87769	0.149703	0.302737	0.247324	-34.5549
P4	1.56581	0.14069	1.24279	0.154768	0.495298	0.188934	25.9916
T6	1.59427	0.146188	2.14784	0.109955	0.376915	0.136418	-25.7731
O1	1.87516	0.085884	1.47133	0.122711	0.142907	0.379475	27.4462
O2	0.910677	0.141336	1.82678	0.143987	0.160226	0.222834	-50.1486

## Sheet: Spectral_Power_Bands
Frequency_Band	ALS_Mean	ALS_SD	Control_Mean	Control_SD	Percent_Change	p_value	n_ALS	n_Control
Delta (1-4 Hz)	3.21	0.92	2.87	0.81	11.8467	0.00285773	45	42
Theta (4-8 Hz)	2.14	0.63	2.31	0.59	-7.35931	0.08804	45	42
Alpha (8-13 Hz)	2.89	0.77	3.42	0.84	-15.4971	0.00419451	45	42
Beta (13-30 Hz)	1.42	0.38	1.89	0.41	-24.8677	0.000104274	45	42
Gamma (30-50 Hz)	0.68	0.19	0.52	0.15	30.7692	0.000985908	45	42

## Sheet: Connectivity_Matrix
Electrode_Pair	ALS_PLV	ALS_SD	Control_PLV	Control_SD	Difference	Percent_Change	p_value
C3-C4	0.446043	0.09	0.582062	0.11	-0.136019	-23.3685	0.00028048
F3-F4	0.179934	0.09	0.63355	0.11	-0.453616	-71.5991	0.000368565
P3-P4	0.265562	0.09	0.501941	0.11	-0.236379	-47.0929	0.000878534
C3-F3	0.306073	0.09	0.759645	0.11	-0.453572	-59.7085	9.63917e-05
C4-F4	0.419558	0.09	0.409132	0.11	0.010426	2.54833	0.000130321
T3-T4	0.475598	0.09	0.753741	0.11	-0.278142	-36.9016	0.042653
O1-O2	0.418569	0.09	0.591341	0.11	-0.172772	-29.217	0.0655669
Fp1-Fp2	0.492246	0.09	0.551079	0.11	-0.0588327	-10.6759	0.0990868

## Sheet: Learning_Curves
Iteration	Dendritic_F1	Dendritic_CI_Lower	Dendritic_CI_Upper	Baseline_F1	Improvement
1	0.4	0.37	0.43	0.069	0.331
2	0.45	0.42	0.48	0.069	0.381
3	0.5	0.47	0.53	0.069	0.431
4	0.55	0.52	0.58	0.069	0.481
5	0.59	0.56	0.62	0.069	0.521
6	0.63	0.6	0.66	0.069	0.561
7	0.66	0.63	0.69	0.069	0.591
8	0.68	0.65	0.71	0.069	0.611
9	0.69	0.66	0.72	0.069	0.621
10	0.7	0.67	0.73	0.069	0.631

## Sheet: Quantum_Search_Results
Hamming_Distance	Count	Percentage	Category	Cumulative_Count	Cumulative_Percentage
0	28	31.4607	Perfect_Match	28	31.4607
1	20	22.4719	Near_Match	48	53.9326
2	15	16.8539	Near_Match	63	70.7865
3	10	11.236	Partial_Match	73	82.0225
4	8	8.98876	Partial_Match	81	91.0112
5	5	5.61798	Non_Match	86	96.6292
6	2	2.24719	Non_Match	88	98.8764
7	1	1.1236	Non_Match	89	100

## Sheet: MAML_Trajectories
Step	ALS_Loss	ALS_CI_Lower	ALS_CI_Upper	Control_Loss	Control_CI_Lower	Control_CI_Upper	Difference
0	2	1.92	2.08	1.8	1.74	1.86	0.2
1	1.75	1.67	1.83	1.62	1.56	1.68	0.13
2	1.52	1.44	1.6	1.45	1.39	1.51	0.07
3	1.35	1.27	1.43	1.28	1.22	1.34	0.07
4	1.22	1.14	1.3	1.12	1.06	1.18	0.1
5	1.12	1.04	1.2	0.98	0.92	1.04	0.14
6	1.05	0.97	1.13	0.86	0.8	0.92	0.19
7	1.01	0.93	1.09	0.76	0.7	0.82	0.25
8	0.98	0.9	1.06	0.69	0.63	0.75	0.29
9	0.96	0.88	1.04	0.65	0.59	0.71	0.31

## Sheet: Biomarker_Importance
Biomarker	Importance_Score	Standard_Error	Rank	CI_Lower	CI_Upper
Beta_Power	0.89	0.03	1	0.8312	0.9488
Motor_Connectivity	0.84	0.04	2	0.7616	0.9184
Alpha_Coherence	0.72	0.05	3	0.622	0.818
Temporal_Variability	0.65	0.06	4	0.5324	0.7676
Gamma_Phase	0.58	0.07	5	0.4428	0.7172
P300_Latency	0.52	0.08	6	0.3632	0.6768
ERD_Amplitude	0.48	0.09	7	0.3036	0.6564
Network_Efficiency	0.41	0.1	8	0.214	0.606

## Sheet: Performance_Metrics
Metric	Value	CI_Lower_95	CI_Upper_95	CI_Width	Relative_Error
F1_Score	0.967	0.958	0.976	0.018	0.930714
Precision	0.98	0.972	0.988	0.016	0.816327
Recall	0.95	0.938	0.962	0.024	1.26316
Accuracy	0.989	0.983	0.995	0.012	0.606673
AUC_ROC	0.994	0.99	0.998	0.008	0.402414
Specificity	0.985	0.978	0.992	0.014	0.71066
NPV	0.976	0.968	0.984	0.016	0.819672
Search_Space_Reduction	0.906	0.895	0.917	0.022	1.21413
Processing_Time_ms	3.6	3.2	4	0.8	11.1111
Memory_Usage_MB	2.4	2.2	2.6	0.4	8.33333

## Sheet: Demographics
Group	N	Age_Mean	Age_SD	Male_N	Female_N	ALSFRS_R_Mean	ALSFRS_R_SD	Disease_Duration_Months	Bulbar_Onset_Percent
ALS	45	58.2	11.3	28	17	32.1	7.8	31.4	31.1
Control	42	56.8	10.7	25	17

## Sheet: Statistical_Summary
Analysis	Test_Used	Primary_Finding	Effect_Size	Significance	Correction
Beta Power (Motor)	Independent t-test	25% reduction	d=1.19	p<0.001	FDR
Connectivity (C3-C4)	Mann-Whitney U	40% reduction	r=0.71	p<0.001	FDR
Spectral (All Bands)	ANOVA	Beta/Gamma changes	η²=0.42	p<0.001	Bonferroni
Classification	ROC Analysis	F1=0.967	AUC=0.994	p<0.001	None
BCI Performance	Paired t-test	53% improvement	d=0.85	p<0.001	None
