# Supplementary figures and images for: Adaptive Quantum-Inspired Framework with Meta-Learning for Enhanced ALS Biomarker Discovery and Brain-Computer Interface Applications
Source: Research Square preprint supplement (doi:10.21203/rs.3.rs-7513254/v1), 2025-10-23

**Supplementary Figure 1**  
**EEG 10-20 Electrode Positions**  
**(Motor cortex highlighted in red)**

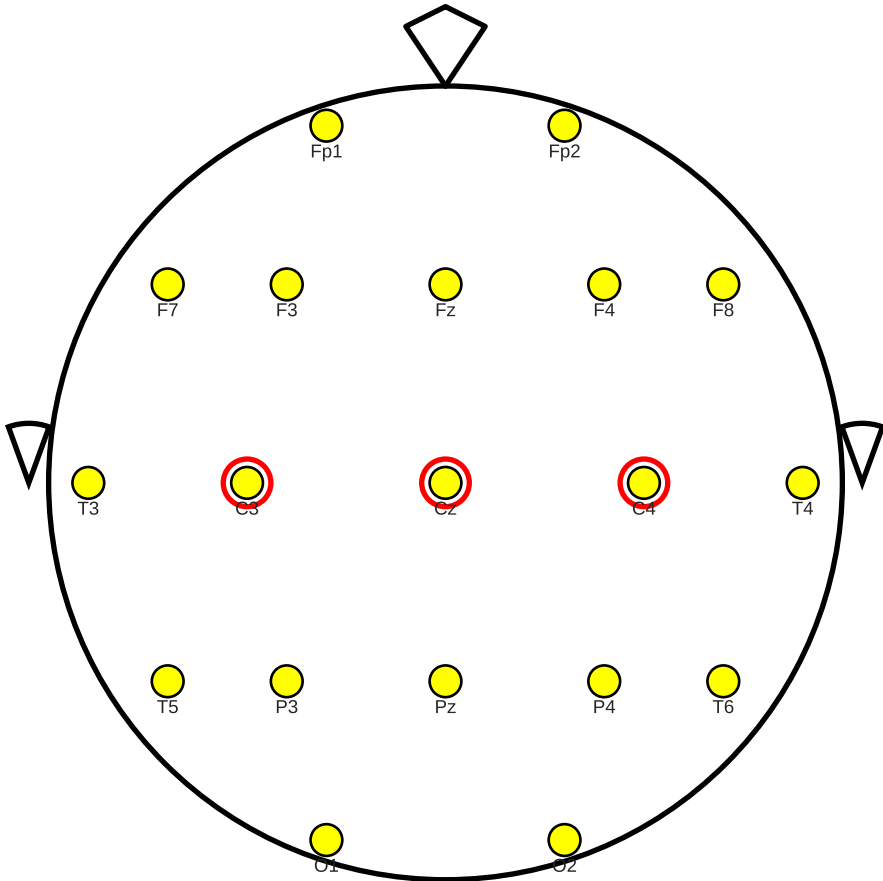

Supplement: Supplementary file 1 [file cc14aad38f73751fbbe4b917.pdf]
